# Supplementary material
Source: publisher figshare collection journal article supplement (https://aacr.figshare.com/articles/dataset/_/22539727)
Supplement: Supplementary file 1 [file 40003054]

## The ***Cell Model Network-UK***

Wellcome Sanger Institute: Mathew Garnett, Hayley Francies, Laura Letchford, Charlotte Beaver, Mya Fekry-Troll, Maria Garcia-Casado, Hazel Rogers, Jessica Davis, James Gilbert, Sara Valentini, Shriram Bhosle, Luke Farrow, Stacey Price, Freddy Gibson, Adam Jackson, Agnieszka Swiatkowska, Emily Scuster, Marie Shamseddin, Mike Stratton, Julia Wilson.

University of Southampton: Tim Underwood, Alex Mirnezami, Ben Grace, Kathy Potter, Ben Sharpe, Robert Walker, Zoë Walters;

University of Glasgow: Owen Sansom, Tamsin Lannagan, Andrew Biankin, the NHSGGC Biorepository;

University of Cambridge: Rebecca Fitzgerald, Xiaodun Li, Nicola Grehan, Conor Flint, Calvin Cheah, Aisling Redmond, Stefan Marciniak, Robert Rintoul, James Brenton, Maria Vias, James Hall;

Royal Papworth Hospital NHS Foundation Trust: Doris Rassel;

University of Birmingham: Andrew D. Beggs, Claudia Maria Pinna, João Silva, Gareth Bicknell, Emma Hurlestone, Sarah Beard, Shannon Smallman, Helen Bermingham, Naren Basu, Abeer Shaaban, Sudha Sundar, Lina Antoun, Elaine Leung, Keith Roberts, Ewen A. Griffiths;

CRUK: Maria Antonietta Cerone;

Imperial College London: Iain McNeish, Darren. Ennis;

Breast Cancer Now Tissue Bank: Louise Jones, Samantha Cutler, Jennifer Gomm, Linda Haywood, Iain Goulding, Samantha Jones
